# Supplementary material
Source: Springer Nature journal article supplement (https://www.springermedizin.de/resource/supplementary/12885_2004_128_MOESM2_ESM.pdf/9468960)

### global health

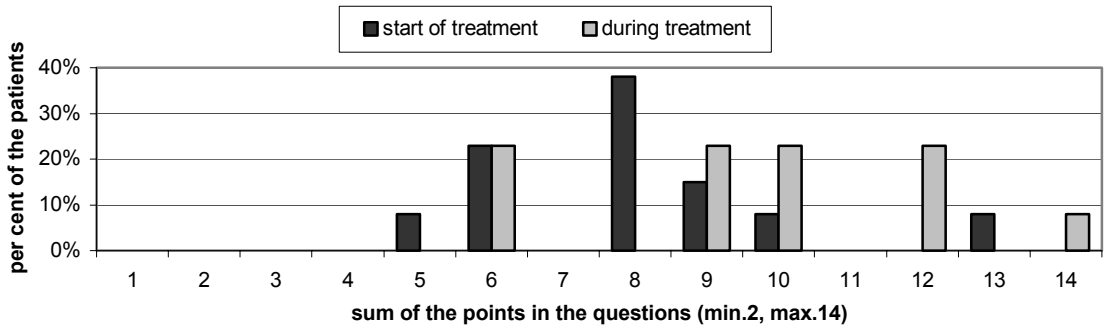

### physical ability

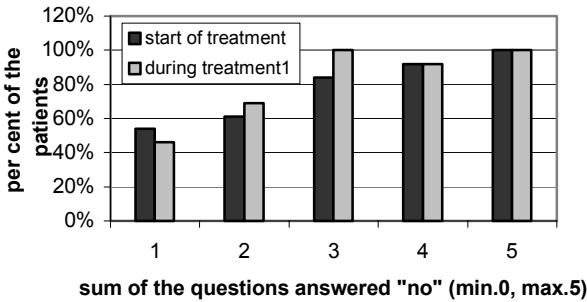

### emotional feelings

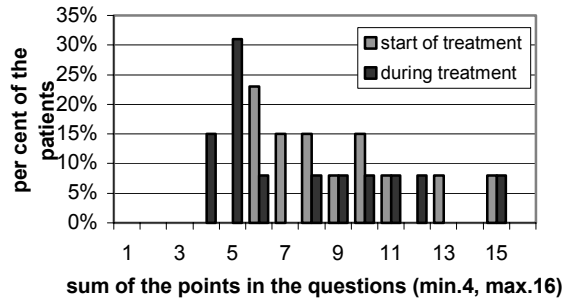

### nausea and vomiting

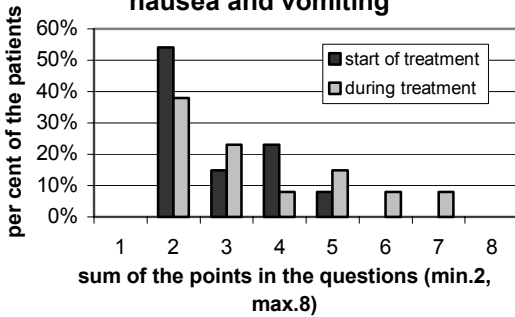

### fatigue

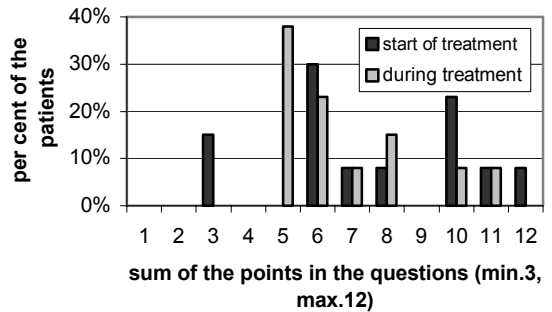

### pain

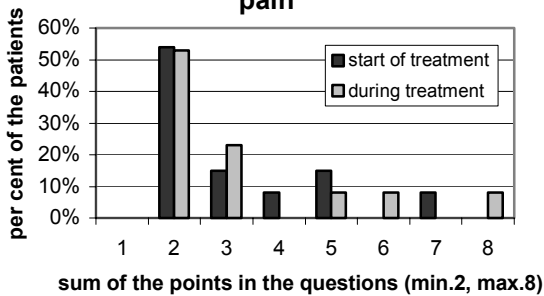

### diarrhea

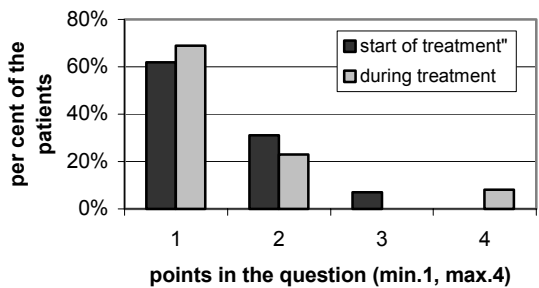

Supplement: MOESM2 [file 9468960]
